# Supplementary material
Source: HighWire-hosted journal article supplement (https://adc.bmj.com/content/109/8/642)
Supplement: inline-supplementary-material-8 [file inline-supplementary-material-8.pdf]

Table S3 - Slope Index of Inequality and Relative Index of Inequality for children with co-existing obesity and caries experience. Data for Figure 3

| School Year | SII <sup>1</sup> | 95% CI <sup>2</sup> | RII <sup>3</sup> | 95% CI <sup>2</sup> |
|-------------|------------------|---------------------|------------------|---------------------|
| 2011/12     | 5.03             | [4.47,5.60]         | 5.05             | [4.48,5.69]         |
| 2012/13     | 4.47             | [3.77,5.17]         | 4.17             | [3.71,4.69]         |
| 2013/14     | 5.57             | [5.13,6.01]         | 5.58             | [4.53,6.89]         |
| 2014/15     | 4.98             | [4.49,5.47]         | 5.54             | [4.49,6.85]         |
| 2015/16     | 4.66             | [4.14,5.18]         | 4.54             | [3.84,5.37]         |
| 2016/17     | 5.44             | [5.06,5.82]         | 5.54             | [4.42,6.95]         |
| 2017/18     | 5.79             | [5.54,6.03]         | 6.25             | [4.50,8.69]         |

<sup>1</sup> SII – Slope Index of Inequality; <sup>2</sup> CI – Confidence Interval; <sup>3</sup> RII – Relative Index of Inequality
